# Supplementary material for: The Effects of Ideological and Ethnoracial Identity on Political (Mis)Information
Source: PubMed Central journal article supplement — Public Opin Q. 2021 Nov 13;85(3):753–79. doi: 10.1093/poq/nfab038 (PMC8643655; doi:10.1093/poq/nfab038), 2021-11-13
Supplement: nfab038_supplementary_data.pdf [file nfab038_supplementary_data.pdf]

**Supplementary Material for “The Effects of Ideological and Ethnoracial Identity on Political (Mis)Information,” published in *Public Opinion Quarterly***

Melody Crowder-Meyer  
Department of Political Science  
Davidson College  
Box 7134, Davidson, NC 28035 USA  
704-894-2285  
mecrowdermeyer@davidson.edu

Mónica Ferrín (corresponding author)  
Department of sociology and communication  
University of A Coruña  
Campus de Elviña, 15070 A Coruña, Spain.  
+34 881014915  
monica.ferrin.pereira@udc.es

Supplementary Material Contents:

|                               |        |
|-------------------------------|--------|
| Description of the Data ..... | pg. 2  |
| Supplementary Tables.....     | pg. 6  |
| Supplementary Figures.....    | pg. 12 |

## **DESCRIPTION OF THE DATA**

### **Supplementary Material Section 1**

#### **Data: 2018 NEWS FACT/OPINION QUESTIONNAIRE**

**Sponsor:** PEW RESEARCH CENTER. Pew Research Center is a nonpartisan fact tank that informs the public about the issues, attitudes and trends shaping the world. It conducts public opinion polling, demographic research, media content analysis and other empirical social science research. Pew Research Center does not take policy positions. It is a subsidiary of The Pew Charitable Trusts.

**Survey data collection process:** The survey was conducted by the GfK Group in English and Spanish using KnowledgePanel, its nationally representative online research panel in the United States. KnowledgePanel members are recruited through probability sampling methods and include those with internet access and those who did not have internet access at the time of their recruitment (KnowledgePanel provides internet access for those who do not have it, and if needed, a device to access the internet when they join the panel). A combination of random-digit dialing (RDD) and address-based sampling (ABS) methodologies have been used to recruit panel members (in 2009 KnowledgePanel switched its sampling methodology for recruiting members from RDD to ABS). KnowledgePanel continually recruits new panel members throughout the year to offset panel attrition as people leave the panel. All active members of the GfK panel were eligible for inclusion in this study. In all, 8,066 panelists were invited to take part in the survey. The resulting dataset contains a nationally representative sample of 5,035 adults 18 years of age or older. Response rate: 62%. The margin of error for the full sample is plus or minus 1.5 percentage points.

**Date of collection:** February 22 to March 4, 2018

**Question wording:**

The questions used in this article are asked around the middle of a survey about media consumption, media trust, and other opinions towards the media.

**DEPENDENT VARIABLE**

**ASK ALL:** You will now be shown a series of statements that have been taken from news stories. Regardless of how knowledgeable you are about the topic, would you consider this statement to be a factual statement (whether you think it is accurate or not) OR an opinion statement (whether you agree with it or not)? **[RANDOMIZE THE 12 IMAGES WITH THE STATEMENTS]**

*[Statements were shown in images that were intended to look like they had been taken from news stories. If respondents skipped this question, they were given a follow-up question asking why they did not answer the question.]*

| A factual statement (whether you think it is accurate or not)                                                 | An opinion statement (whether you agree with it or not) | No answer |
|---------------------------------------------------------------------------------------------------------------|---------------------------------------------------------|-----------|
| 1. Health care costs per person in the U.S. are the highest in the developed world                            |                                                         |           |
| 2. President Barack Obama was born in the United States                                                       |                                                         |           |
| 3. Immigrants who are in the U.S. illegally have some rights under the Constitution                           |                                                         |           |
| 4. ISIS lost a significant portion of its territory in Iraq and Syria in 2017                                 |                                                         |           |
| 5. Spending on Social Security, Medicare, and Medicaid make up the largest portion of the U.S. federal budget |                                                         |           |
| 6. Democracy is the greatest form of government                                                               |                                                         |           |
| 7. Increasing the federal minimum wage to \$15 an hour is essential for the health of the U.S. economy        |                                                         |           |
| 8. Abortion should be legal in most cases                                                                     |                                                         |           |
| 9. Immigrants who are in the U.S. illegally are a very big problem for the country today                      |                                                         |           |
| 10. Government is almost always wasteful and inefficient                                                      |                                                         |           |
| 11. Applying additional scrutiny to Muslim Americans would not reduce terrorism in the U.S.                   |                                                         |           |
| 12. Voter fraud across the U.S. has undermined the results of our elections                                   |                                                         |           |

*Note: Two of the statements (items 6 and 12) could not be clearly classified by ideological and ethnoracial group interests due to their ambiguity. These items are therefore not included in our analyses.*

**INDEPENDENT VARIABLES**

***Ideology***

**ASK ALL:** In general, would you describe your political views as **[REVERSE ORDER FOR HALF OR RESPONDENTS]**

- Very conservative
- Conservative
- Moderate
- Liberal
- Very Liberal

No answer

***Partisanship***

ASK ALL: In politics today, do you consider yourself a...?

- Republican
- Democrat
- Independent
- Something else
- No answer

***Trust in media***

How much, if at all, do you trust the information you get from national news organizations?

- A lot
- Some
- Not too much
- Not at all

NOTE: the exact wording is not included in the questionnaire for the following variables, and therefore only response categories are indicated

***Ethnoracial identity***

- White, Non-Hispanic
- Black, Non-Hispanic
- Other, Non-Hispanic
- Hispanic
- 2+ Races, Non-Hispanic

***Sex***

- Male
- Female

***Education***

- Less than high school
- High school
- Some college
- Bachelor's degree or higher

***Household income***

- Less than \$5,000
- \$5,000 to \$7,499
- \$7,500 to \$9,999
- \$10,000 to \$12,499
- \$12,500 to \$14,999
- \$15,000 to \$19,999
- \$20,000 to \$24,999
- \$25,000 to \$29,999

\$30,000 to \$34,999  
 \$35,000 to \$39,999  
 \$40,000 to \$49,999  
 \$50,000 to \$59,999  
 \$60,000 to \$74,999  
 \$75,000 to \$84,999  
 \$85,000 to \$99,999  
 \$100,000 to \$124,999  
 \$125,000 to \$149,999  
 \$150,000 to \$174,999  
 \$175,000 to \$199,999  
 \$200,000 to \$249,999  
 \$250,000 or more

**Table SM.1 Descriptive Statistics**

|              |                | PEW           |               | ANES 2016     |           |
|--------------|----------------|---------------|---------------|---------------|-----------|
|              |                | Freq.         | Percent       | Freq.         | Percent   |
| ALL          |                | 5035          |               | 4270          |           |
| GENDER       | male           | 2444          | 48.54         | 526           | 44.58     |
|              | female         | 2591          | 51.46         | 654           | 55.42     |
| EDUCATION    | highschool     | 1698          | 33.72         | 1384          | 37.94     |
|              | college        | 1400          | 27.81         | 1091          | 29.9      |
|              | bachelor       | 1937          | 38.47         | 1156          | 31.69     |
| ETHNORACE    | white          | 3649          | 72.47         | 2531          | 69.38     |
|              | Black          | 444           | 8.82          | 397           | 10.88     |
|              | Hispanic       | 566           | 11.24         | 432           | 11.85     |
|              | other          | 376           | 7.47          | 269           | 7.37      |
| IDEOLOGY     | liberal        | 1112          | 22.63         | 925           | 32.12     |
|              | moderate       | 2151          | 43.77         | 772           | 26.81     |
|              | conservative   | 1651          | 33.60         | 1182          | 41.06     |
| PARTISANSHIP | Republican     | 1437          | 29.14         | 1017          | 28.36     |
|              | Democrat       | 1633          | 33.12         | 1285          | 35.86     |
|              | Independent    | 1438          | 29.16         | 1161          | 32.39     |
|              | Something else | 423           | 8.58          | 121           | 3.38      |
|              |                | Mean          | min./max.     | Mean          | min./max. |
| AGE          |                | 52.11         | 18/94         | 47.39         | 18/90     |
| INCOME       |                | 60,000-74,999 | 5,000/250,000 | 50,000-59,999 | unknown   |
| TRUST MEDIA  |                | 2.87          | 1/4           |               |           |

## SUPPLEMENTARY TABLES

**Table SM.2 Logistic regression models**

| VARIABLES                         | obamaC               |          | immproblemC          |          | abortionC            |          | governmentC          |          |
|-----------------------------------|----------------------|----------|----------------------|----------|----------------------|----------|----------------------|----------|
|                                   | Coef.                | p-values | Coef.                | p-values | Coef.                | p-values | Coef.                | p-values |
| Sex (1=female)                    | 0.0844<br>(0.0888)   | 0.341    | 0.0184<br>(0.0751)   | 0.807    | 0.0839<br>(0.0869)   | 0.335    | 0.276<br>(0.0754)    | 0.000    |
| Age                               | -0.0125<br>(0.00256) | 0.000    | -0.0159<br>(0.00231) | 0.000    | -0.0136<br>(0.00264) | 0.000    | -0.0262<br>(0.00241) | 0.000    |
| Some college<br>(ref. Highschool) | 0.486<br>(0.103)     | 0.000    | 0.269<br>(0.0913)    | 0.003    | 0.131<br>(0.104)     | 0.212    | 0.249<br>(0.0908)    | 0.006    |
| Bachelor<br>(ref. Highschool)     | 1.045<br>(0.113)     | 0.000    | 0.938<br>(0.0985)    | 0.000    | 0.541<br>(0.115)     | 0.000    | 0.821<br>(0.101)     | 0.000    |
| Income                            | 0.0817<br>(0.0104)   | 0.000    | 0.0257<br>(0.00937)  | 0.006    | 0.0391<br>(0.0107)   | 0.000    | 0.0323<br>(0.00920)  | 0.000    |
| Trust in media                    | 0.525<br>(0.0534)    | 0.000    | 0.232<br>(0.0471)    | 0.000    | -0.0576<br>(0.0591)  | 0.330    | 0.346<br>(0.0477)    | 0.000    |
| Democrat<br>(ref. Republican)     | 1.275<br>(0.141)     | 0.000    | 0.815<br>(0.120)     | 0.000    | -0.458<br>(0.144)    | 0.002    | 0.374<br>(0.123)     | 0.002    |
| Independent<br>(ref. Republican)  | 0.741<br>(0.112)     | 0.000    | 0.521<br>(0.0981)    | 0.000    | -0.136<br>(0.133)    | 0.307    | 0.211<br>(0.103)     | 0.041    |
| Other<br>(ref. Republican)        | 0.446<br>(0.160)     | 0.005    | 0.767<br>(0.149)     | 0.000    | -0.194<br>(0.189)    | 0.303    | 0.0587<br>(0.150)    | 0.696    |
| Moderate<br>(ref. Liberal)        | -0.488<br>(0.151)    | 0.001    | -0.565<br>(0.118)    | 0.000    | 0.131<br>(0.110)     | 0.235    | 0.0103<br>(0.108)    | 0.924    |
| Conservative<br>(ref. Liberal)    | -0.669<br>(0.161)    | 0.000    | -1.052<br>(0.131)    | 0.000    | 0.360<br>(0.145)     | 0.013    | -0.226<br>(0.126)    | 0.073    |
| Black<br>(ref. White)             | 0.356<br>(0.191)     | 0.062    | 0.430<br>(0.153)     | 0.000    | -0.698<br>(0.137)    | 0.000    | -0.672<br>(0.132)    | 0.000    |
| Hispanic<br>(ref. White)          | -0.0931<br>(0.141)   | 0.508    | 0.226<br>(0.128)     | 0.077    | -0.638<br>(0.124)    | 0.000    | -0.695<br>(0.118)    | 0.000    |
| Other<br>(ref. White)             | 0.0371<br>(0.204)    | 0.856    | -0.0963<br>(0.171)   | 0.574    | -0.117<br>(0.182)    | 0.521    | -0.430<br>(0.168)    | 0.011    |
| Constant                          | -1.136<br>(0.277)    | 0.000    | 0.306<br>(0.245)     | 0.212    | 1.905<br>(0.292)     | 0.000    | 0.547<br>(0.241)     | 0.023    |
| Observations                      | 4,815                |          | 4,829                |          | 4,825                |          | 4,836                |          |

*Note:* Standard errors in parentheses. Tests of significance are two-tailed. All data are weighted. Data Source: Pew Research Center 2018

**Table SM.2 cont.**

| VARIABLES                         | immrightsC           |         | isisC                 |         | wageC                 |         | socialcostC          |         |
|-----------------------------------|----------------------|---------|-----------------------|---------|-----------------------|---------|----------------------|---------|
|                                   | Coef.                | p-value | Coef.                 | p-value | Coef.                 | p-value | Coef.                | p-value |
| Sex (1=female)                    | -0.0606<br>(0.0682)  | 0.375   | -0.395<br>(0.0748)    | 0.000   | -0.146<br>(0.0805)    | 0.066   | -0.0181<br>(0.0686)  | 0.792   |
| Age                               | -0.0156<br>(0.00215) | 0.000   | -0.00577<br>(0.00226) | 0.011   | -0.00313<br>(0.00245) | 0.200   | -0.0217<br>(0.00213) | 0.000   |
| Some college<br>(ref. Highschool) | 0.118<br>(0.0865)    | 0.172   | 0.262<br>(0.0904)     | 0.004   | 0.348<br>(0.0970)     | 0.000   | 0.163<br>(0.0845)    | 0.053   |
| Bachelor<br>(ref. Highschool)     | 0.427<br>(0.0889)    | 0.000   | 0.630<br>(0.0972)     | 0.000   | 0.879<br>(0.108)      | 0.000   | 0.848<br>(0.0895)    | 0.000   |
| Income                            | 0.0208<br>(0.00835)  | 0.013   | 0.0357<br>(0.00894)   | 0.000   | 0.0476<br>(0.00965)   | 0.000   | 0.0385<br>(0.00833)  | 0.000   |
| Trust in media                    | 0.373<br>(0.0434)    | 0.000   | 0.235<br>(0.0471)     | 0.000   | -0.126<br>(0.0524)    | 0.016   | 0.203<br>(0.0443)    | 0.000   |
| Democrat<br>(ref. Republican)     | 0.397<br>(0.106)     | 0.000   | -0.135<br>(0.116)     | 0.247   | -0.535<br>(0.129)     | 0.000   | -0.249<br>(0.110)    | 0.023   |
| Independent<br>(ref. Republican)  | 0.231<br>(0.0923)    | 0.012   | 0.0873<br>(0.107)     | 0.413   | -0.0439<br>(0.124)    | 0.722   | -0.0668<br>(0.0964)  | 0.489   |
| Other<br>(ref. Republican)        | 0.179<br>(0.138)     | 0.194   | -0.245<br>(0.147)     | 0.095   | -0.255<br>(0.168)     | 0.129   | -0.456<br>(0.138)    | 0.001   |
| Moderate<br>(ref. Liberal)        | -0.472<br>(0.0968)   | 0.000   | -0.262<br>(0.102)     | 0.010   | 0.0259<br>(0.104)     | 0.803   | -0.0451<br>(0.0922)  | 0.625   |
| Conservative<br>(ref. Liberal)    | -0.727<br>(0.113)    | 0.000   | -0.0770<br>(0.125)    | 0.537   | 0.282<br>(0.134)      | 0.036   | 0.230<br>(0.112)     | 0.040   |
| Black<br>(ref. White)             | -0.0633<br>(0.123)   | 0.606   | -0.796<br>(0.126)     | 0.000   | -0.962<br>(0.127)     | 0.000   | -0.661<br>(0.122)    | 0.000   |
| Hispanic<br>(ref. White)          | 0.234<br>(0.113)     | 0.037   | -0.541<br>(0.111)     | 0.000   | -0.874<br>(0.113)     | 0.000   | -0.172<br>(0.111)    | 0.119   |
| Other<br>(ref. White)             | -0.289<br>(0.148)    | 0.052   | -0.491<br>(0.155)     | 0.002   | -0.402<br>(0.168)     | 0.017   | -0.228<br>(0.145)    | 0.115   |
| Constant                          | -0.259<br>(0.218)    | 0.235   | 0.387<br>(0.239)      | 0.106   | 1.179<br>(0.264)      | 0.000   | 0.258<br>(0.223)     | 0.247   |
| Observations                      | 4,819                |         | 4,790                 |         | 4,828                 |         | 4,814                |         |

*Note:* Standard errors in parentheses. Tests of significance are two-tailed. All data are weighted. Data Source: Pew Research Center 2018

**Table SM.2 cont.**

| VARIABLES                         | healthcareC           |         | muslimsC              |         |
|-----------------------------------|-----------------------|---------|-----------------------|---------|
|                                   | Coef.                 | p-value | Coef.                 | p-value |
| Sex (1=female)                    | 0.0249<br>(0.0799)    | 0.755   | 0.0483<br>(0.0791)    | 0.541   |
| Age                               | -0.00533<br>(0.00238) | 0.025   | -0.00447<br>(0.00240) | 0.062   |
| Some college<br>(ref. Highschool) | 0.197<br>(0.0973)     | 0.043   | 0.152<br>(0.0982)     | 0.122   |
| Bachelor<br>(ref. Highschool)     | 0.447<br>(0.102)      | 0.000   | 0.349<br>(0.105)      | 0.001   |
| Income                            | 0.0343<br>(0.00962)   | 0.000   | 0.0359<br>(0.00945)   | 0.000   |
| Trust in media                    | 0.289<br>(0.0499)     | 0.000   | -0.0397<br>(0.0524)   | 0.449   |
| Democrat<br>(ref. Republican)     | 0.349<br>(0.127)      | 0.006   | -0.443<br>(0.129)     | 0.001   |
| Independent<br>(ref. Republican)  | 0.155<br>(0.108)      | 0.151   | -0.0632<br>(0.118)    | 0.593   |
| Other<br>(ref. Republican)        | 0.282<br>(0.159)      | 0.077   | -0.408<br>(0.163)     | 0.012   |
| Moderate<br>(ref. Liberal)        | -0.317<br>(0.119)     | 0.008   | 0.245<br>(0.101)      | 0.015   |
| Conservative<br>(ref. Liberal)    | -0.464<br>(0.136)     | 0.001   | 0.283<br>(0.129)      | 0.028   |
| Black<br>(ref. White)             | -0.344<br>(0.144)     | 0.017   | -0.694<br>(0.129)     | 0.000   |
| Hispanic<br>(ref. White)          | -0.758<br>(0.118)     | 0.000   | -0.758<br>(0.113)     | 0.000   |
| Other<br>(ref. White)             | -0.521<br>(0.164)     | 0.002   | -0.448<br>(0.158)     | 0.005   |
| Constant                          | 0.370<br>(0.255)      | 0.146   | 1.126<br>(0.255)      | 0.000   |
| Observations                      | 4,825                 |         | 4,818                 |         |

*Note:* Standard errors in parentheses. Tests of significance are two-tailed. All data are weighted. Data Source: Pew Research Center 2018



**Table SM.2 cont.**

| VARIABLES                         | Number correct liberal scale |         | Number correct ethnoracial scale |         |
|-----------------------------------|------------------------------|---------|----------------------------------|---------|
|                                   | Coef.                        | p-value | Coef.                            | p-value |
| Sex (1=female)                    | -0.00280<br>(0.00518)        | 0.589   | 0.000905<br>(0.00279)            | 0.746   |
| Age                               | -0.00235<br>(0.000155)       | 0.000   | -0.000930<br>(8.36e-05)          | 0.000   |
| Some college<br>(ref. Highschool) | 0.0485<br>(0.00654)          | 0.000   | 0.0204<br>(0.00352)              | 0.000   |
| Bachelor<br>(ref. Highschool)     | 0.119<br>(0.00708)           | 0.000   | 0.0464<br>(0.00381)              | 0.000   |
| Income                            | 0.00727<br>(0.000622)        | 0.000   | 0.00278<br>(0.000335)            | 0.000   |
| Trust in media                    | 0.0381<br>(0.00327)          | 0.000   | 0.0205<br>(0.00176)              | 0.000   |
| Democrat<br>(ref. Republican)     | 0.0236<br>(0.00822)          | 0.004   | 0.0359<br>(0.00443)              | 0.000   |
| Independent<br>(ref. Republican)  | 0.0365<br>(0.00746)          | 0.000   | 0.0299<br>(0.00402)              | 0.000   |
| Other<br>(ref. Republican)        | 0.00768<br>(0.0103)          | 0.457   | 0.0226<br>(0.00557)              | 0.000   |
| Moderate<br>(ref. Liberal)        | -0.0257<br>(0.00691)         | 0.000   | -0.0174<br>(0.00372)             | 0.000   |
| Conservative<br>(ref. Liberal)    | -0.0353<br>(0.00840)         | 0.000   | -0.0359<br>(0.00453)             | 0.000   |
| Black<br>(ref. White)             | -0.0857<br>(0.00872)         | 0.000   | -0.00264<br>(0.00470)            | 0.575   |
| Hispanic<br>(ref. White)          | -0.0740<br>(0.00766)         | 0.000   | -0.00500<br>(0.00412)            | 0.225   |
| Other<br>(ref. White)             | -0.0526<br>(0.00970)         | 0.000   | -0.0158<br>(0.00522)             | 0.002   |
| Constant                          | 0.595<br>(0.0160)            | 0.000   | 0.204<br>(0.00863)               | 0.000   |
| Observations                      | 4,843                        |         | 4,840                            |         |
| R-squared                         | 0.251                        |         | 0.201                            |         |

*Note:* Standard errors in parentheses. Tests of significance are two-tailed. All data are weighted. Data Source: Pew Research Center 2018

**Table SM.3 Interactive models ideology × ethnoracial membership**

| VARIABLES                         | Ideological statements scale<br>(Model 1) |         | Ethnoracial statements scale<br>(Model 2) |         |
|-----------------------------------|-------------------------------------------|---------|-------------------------------------------|---------|
|                                   | Coef.                                     | p-value | Coef.                                     | p-value |
| Sex (1=female)                    | 0.0119<br>(0.00432)                       | 0.006   | -0.00154<br>(0.00710)                     | 0.828   |
| Age                               | -0.000538<br>(0.000128)                   | 0.000   | -0.00195<br>(0.000211)                    | 0.000   |
| Some college<br>(ref. Highschool) | 0.00539<br>(0.00540)                      | 0.318   | 0.0331<br>(0.00887)                       | 0.000   |
| Bachelor<br>(ref. Highschool)     | 0.00784<br>(0.00588)                      | 0.182   | 0.0933<br>(0.00966)                       | 0.000   |
| Income                            | -0.000359<br>(0.000520)                   | 0.490   | 0.00334<br>(0.000855)                     | 0.000   |
| Trust in media                    | 0.0276<br>(0.00273)                       | 0.000   | 0.0558<br>(0.00448)                       | 0.000   |
| Democrat<br>(ref. Republican)     | 0.0809<br>(0.00695)                       | 0.000   | 0.122<br>(0.0114)                         | 0.000   |
| Independent<br>(ref. Republican)  | 0.0356<br>(0.00625)                       | 0.000   | 0.0766<br>(0.0103)                        | 0.000   |
| Other<br>(ref. Republican)        | 0.0576<br>(0.00862)                       | 0.000   | 0.0917<br>(0.0142)                        | 0.000   |
| Moderate<br>(ref. Liberal)        | -0.0308<br>(0.00730)                      | 0.000   | -0.0788<br>(0.0120)                       | 0.000   |
| Conservative<br>(ref. Liberal)    | -0.0807<br>(0.00835)                      | 0.000   | -0.137<br>(0.0137)                        | 0.000   |
| Black<br>(ref. White)             | 0.0634<br>(0.0126)                        | 0.000   | 0.0410<br>(0.0207)                        | 0.048   |
| Hispanic<br>(ref. White)          | 0.0234<br>(0.0114)                        | 0.040   | 0.0263<br>(0.0188)                        | 0.161   |
| Black × moderate                  | 0.00537<br>(0.0157)                       | 0.732   | 0.0312<br>(0.0257)                        | 0.225   |
| Black × conservative              | 0.0125<br>(0.0196)                        | 0.523   | 0.0251<br>(0.0323)                        | 0.438   |
| Hispanic × moderate               | 0.0158<br>(0.0142)                        | 0.265   | 0.0249<br>(0.0233)                        | 0.284   |
| Hispanic × conservative           | 0.0441<br>(0.0167)                        | 0.008   | 0.110<br>(0.0274)                         | 0.000   |
| Constant                          | 0.412<br>(0.0140)                         | 0.000   | 0.406<br>(0.0230)                         | 0.000   |
| Observations                      | 4,488                                     |         | 4,485                                     |         |
| R-squared                         | 0.229                                     |         | 0.243                                     |         |

*Note:* Standard errors in parentheses. Tests of significance are two-tailed. All data are weighted. Data Source: Pew Research Center 2018

**Table SM.4 Interactive models partisanship × ethnoracial membership**

| VARIABLES                         | Ideological statements scale (Model 1) |         | Ethnoracial statements scale (Model 2) |         |
|-----------------------------------|----------------------------------------|---------|----------------------------------------|---------|
|                                   | Coef.                                  | p-value | Coef.                                  | p-value |
| Sex (1=female)                    | 0.0152<br>(0.00454)                    | 0.001   | 0.000737<br>(0.00735)                  | 0.920   |
| Age                               | -0.000520<br>(0.000133)                | 0.000   | -0.00182<br>(0.000215)                 | 0.000   |
| Some college<br>(ref. Highschool) | 0.00562<br>(0.00571)                   | 0.325   | 0.0291<br>(0.00925)                    | 0.002   |
| Bachelor<br>(ref. Highschool)     | 0.00920<br>(0.00613)                   | 0.133   | 0.0918<br>(0.00993)                    | 0.000   |
| Income                            | -0.000645<br>(0.000554)                | 0.245   | 0.00324<br>(0.000898)                  | 0.000   |
| Trust in media                    | 0.0285<br>(0.00290)                    | 0.000   | 0.0541<br>(0.00470)                    | 0.000   |
| Moderate<br>(ref. Liberal)        | -0.0265<br>(0.00615)                   | 0.000   | -0.0665<br>(0.00996)                   | 0.000   |
| Conservative<br>(ref. Liberal)    | -0.0719<br>(0.00749)                   | 0.000   | -0.113<br>(0.0122)                     | 0.000   |
| Black<br>(ref. White)             | 0.0812<br>(0.0294)                     | 0.006   | 0.173<br>(0.0476)                      | 0.000   |
| Hispanic<br>(ref. White)          | 0.0471<br>(0.0146)                     | 0.001   | 0.0956<br>(0.0237)                     | 0.000   |
| Democrat<br>(ref. Republican)     | 0.0817<br>(0.00799)                    | 0.000   | 0.148<br>(0.0130)                      | 0.000   |
| Independent<br>(ref. Republican)  | 0.0385<br>(0.00674)                    | 0.000   | 0.0812<br>(0.0109)                     | 0.000   |
| Black × Democrat                  | -0.0201<br>(0.0307)                    | 0.513   | -0.153<br>(0.0497)                     | 0.002   |
| Black × Independent               | 0.00555<br>(0.0328)                    | 0.866   | -0.0210<br>(0.0531)                    | 0.692   |
| Hispanic × Democrat               | 0.00748<br>(0.0172)                    | 0.664   | -0.0482<br>(0.0279)                    | 0.084   |
| Hispanic × Independent            | -0.0231<br>(0.0185)                    | 0.211   | -0.0524<br>(0.0299)                    | 0.080   |
| Constant                          | 0.403<br>(0.0142)                      | 0.000   | 0.384<br>(0.0230)                      | 0.000   |
| Observations                      | 4,136                                  |         | 4,134                                  |         |
| R-squared                         | 0.238                                  |         | 0.255                                  |         |

*Note:* Standard errors in parentheses. Tests of significance are two-tailed. All data are weighted. Data Source: Pew Research Center 2018

## SUPPLEMENTARY FIGURES

Figures from the interaction between partisanship  $\times$  ethnoracial membership

Figure SM.1 From Table SM.4 – ideological statements scale

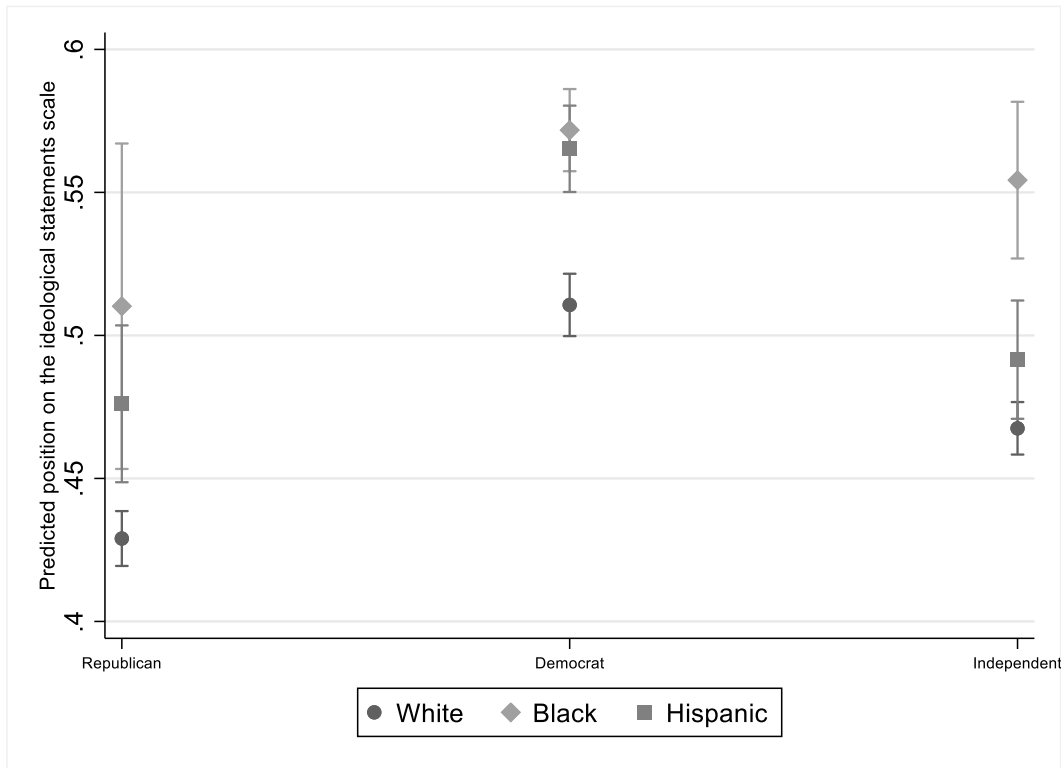

Note: Figure presents the marginal effects of a respondent's partisan identification (and 95% confidence intervals), dependent on their ethnoracial membership, on the ideological statements scale, based on the interaction model estimations (between the partisanship and ethnoracial variables) - Model 1 of Table SM.4.

**Figure SM.2 From Table SM.4 – ethnoracial statements scale**

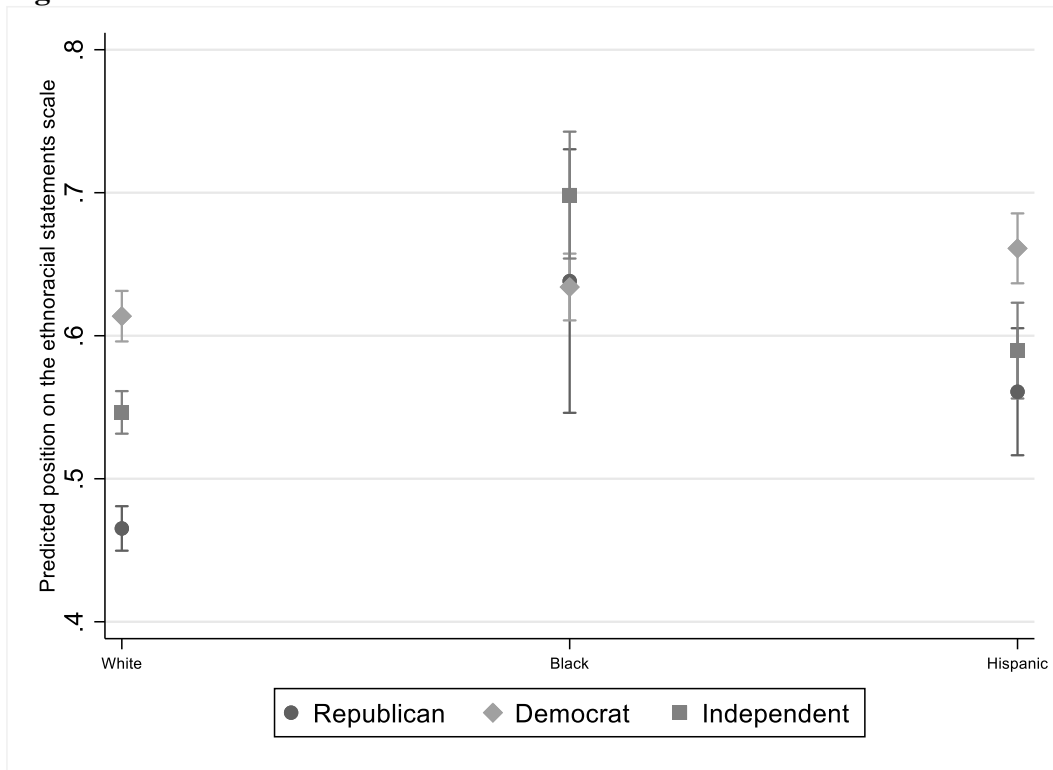

Note: Figure presents the marginal effects of a respondent’s ethnoracial membership (and 95% confidence intervals), dependent on their partisan identification, on the ethnoracial statements scale, based on the interaction model estimations (between the partisanship and ethnoracial variables) - Model 2 of Table SM.4.

**Figure SM.3 Test for expressive responding among conservative respondents**

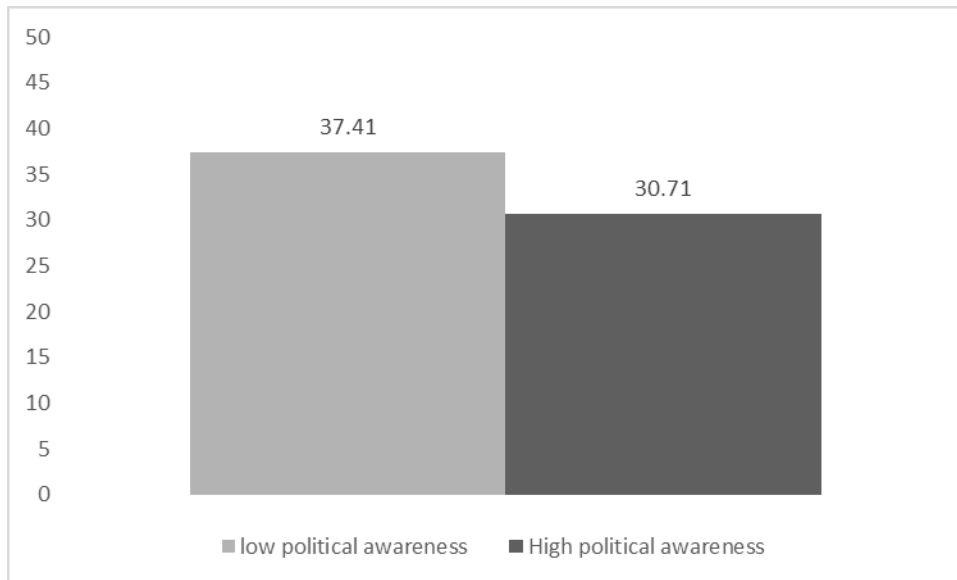

Note: Figure presents the percent of conservative respondents providing an incorrect classification – as opinion – of the statement ‘President Barack Obama was born in the United States’, by political awareness (a composite index measuring political knowledge and interest in politics and government). Differences are statistically significant at  $p=0.083$  (two-tailed significance tests; weighted data). These differences hold even after controlling for age, sex, education, income, trust in media, partisanship and ethnoracial membership. Respondents with low political awareness are significantly more likely to choose the incorrect answer than respondents with high political awareness, against the ‘expressive responding hypothesis’ (the most politically aware should be the most likely to bias their answers – classify the statement as an opinion).
